# Supplementary material for: Pyrosequencing revealed highly microbial phylogenetic diversity in ferromanganese nodules from farmland
Source: Royal Society of Chemistry journal article supplement (doi:10.1039/c4em00407h), 2014-12-11
Supplement: c4em00407h1.pdf [file c4em00407h1.pdf]

## Supporting Information

---

**Table S1.** Pearson correlations of values of geochemical properties in ferromanganese nodules.

---

**Table S2.** Pearson correlations of values of geochemical properties in surrounding soils.

---

**Table S3.** Alpha diversity indices of ferromanganese nodules and surrounding soil.

---

**Table S4.** Microbial composition of ferromanganese nodules at order level.

---

**Table S5.** Microbial composition of surrounding soil at order level.

---

**Table S6.** Pearson correlations of values of weathering indices with microbial composition.

---

---

**Fig. S1.** Representative images of ferromanganese nodules from a sugarcane field and a paddy field.

---

**Fig. S2.** XRD spectra of ferromanganese nodules.

---

**Fig. S3.** Relative abundance of selected microbial taxa in the ferromanganese nodules and surrounding soil from sugarcane field and paddy field.

---

**Table S1.** Pearson correlations of values of geochemical properties in ferromanganese nodules.

|                                | Fe <sub>d</sub> | Mn <sub>d</sub> | Fe <sub>o</sub> | Fe <sub>p</sub> | Fe(III) | Fe(II)       | Total Fe       | Total Mn       | Total Mg       | Total Ca | Total K        | Total P      | OM             | Fe <sub>2</sub> O <sub>3</sub> | SiO <sub>2</sub> | Al <sub>2</sub> O <sub>3</sub> |
|--------------------------------|-----------------|-----------------|-----------------|-----------------|---------|--------------|----------------|----------------|----------------|----------|----------------|--------------|----------------|--------------------------------|------------------|--------------------------------|
| Fe <sub>d</sub>                | 1               |                 |                 |                 |         |              |                |                |                |          |                |              |                |                                |                  |                                |
| Mn <sub>d</sub>                | -.484           | 1               |                 |                 |         |              |                |                |                |          |                |              |                |                                |                  |                                |
| Fe <sub>o</sub>                | -.035           | -.098           | 1               |                 |         |              |                |                |                |          |                |              |                |                                |                  |                                |
| Fe <sub>p</sub>                | -.160           | -.183           | -.268           | 1               |         |              |                |                |                |          |                |              |                |                                |                  |                                |
| Fe(III)                        | .135            | -.185           | .128            | -.156           | 1       |              |                |                |                |          |                |              |                |                                |                  |                                |
| Fe(II)                         | -.130           | .295            | .219            | -.098           | .522    | 1            |                |                |                |          |                |              |                |                                |                  |                                |
| Total Fe                       | .130            | -.487           | .117            | -.550           | .126    | -.167        | 1              |                |                |          |                |              |                |                                |                  |                                |
| Total Mn                       | <b>-.631*</b>   | <b>.975**</b>   | -.083           | -.095           | -.169   | .293         | -.511          | 1              |                |          |                |              |                |                                |                  |                                |
| Total Mg                       | <b>-.711**</b>  | <b>.798**</b>   | -.118           | .169            | -.170   | .196         | -.552          | <b>.893**</b>  | 1              |          |                |              |                |                                |                  |                                |
| Total Ca                       | -.099           | .163            | .100            | -.311           | .275    | <b>.632*</b> | .165           | .187           | .166           | 1        |                |              |                |                                |                  |                                |
| Total K                        | <b>-.738**</b>  | <b>.755**</b>   | -.185           | .283            | -.135   | .189         | <b>-.614*</b>  | <b>.864**</b>  | <b>.978**</b>  | .154     | 1              |              |                |                                |                  |                                |
| Total P                        | -.388           | <b>.602*</b>    | .474            | -.480           | .059    | .463         | .047           | .580*          | .353           | .220     | .234           | 1            |                |                                |                  |                                |
| OM                             | -.490           | <b>.663*</b>    | .119            | -.482           | -.393   | .070         | -.022          | <b>.699**</b>  | <b>.653*</b>   | .277     | .538           | .547         | 1              |                                |                  |                                |
| Fe <sub>2</sub> O <sub>3</sub> | .130            | -.487           | .117            | -.550           | .126    | -.167        | <b>1.000**</b> | -.511          | -.552          | .165     | <b>-.614*</b>  | .047         | -.022          | 1                              |                  |                                |
| SiO <sub>2</sub>               | <b>.591*</b>    | <b>-.730**</b>  | .294            | -.128           | .358    | .035         | .436           | <b>-.810**</b> | <b>-.936**</b> | -.089    | <b>-.891**</b> | -.231        | <b>-.711**</b> | .436                           | 1                |                                |
| Al <sub>2</sub> O <sub>3</sub> | -.144           | <b>.670*</b>    | .088            | -.272           | -.154   | .135         | -.468          | <b>.642*</b>   | .520           | -.113    | .422           | <b>.560*</b> | .565*          | -.468                          | -.472            | 1                              |

\* $P < 0.05$ ; \*\* $P < 0.01$ .

**Table S2.** Pearson correlations of values of geochemical properties in surrounding soils.

|                                | Fe <sub>d</sub> | Mn <sub>d</sub> | Fe <sub>o</sub> | Fe <sub>p</sub> | Fe(III)        | Fe(II)        | Total Fe       | Total Mn       | Total Mg       | Total Ca      | Total K        | Total P       | OM    | Fe <sub>2</sub> O <sub>3</sub> | SiO <sub>2</sub> | Al <sub>2</sub> O <sub>3</sub> | pH |
|--------------------------------|-----------------|-----------------|-----------------|-----------------|----------------|---------------|----------------|----------------|----------------|---------------|----------------|---------------|-------|--------------------------------|------------------|--------------------------------|----|
| Fe <sub>d</sub>                | 1               |                 |                 |                 |                |               |                |                |                |               |                |               |       |                                |                  |                                |    |
| Mn <sub>d</sub>                | <b>-.699**</b>  | 1               |                 |                 |                |               |                |                |                |               |                |               |       |                                |                  |                                |    |
| Fe <sub>o</sub>                | <b>-.565*</b>   | <b>.667*</b>    | 1               |                 |                |               |                |                |                |               |                |               |       |                                |                  |                                |    |
| Fe <sub>p</sub>                | -.511           | .362            | <b>.870**</b>   | 1               |                |               |                |                |                |               |                |               |       |                                |                  |                                |    |
| Fe(III)                        | <b>-.609*</b>   | <b>.885**</b>   | <b>.632*</b>    | .314            | 1              |               |                |                |                |               |                |               |       |                                |                  |                                |    |
| Fe(II)                         | -.449           | <b>.838**</b>   | <b>.782**</b>   | .428            | <b>.922**</b>  | 1             |                |                |                |               |                |               |       |                                |                  |                                |    |
| Total Fe                       | <b>.705**</b>   | -.288           | -.448           | -.501           | -.195          | -.143         | 1              |                |                |               |                |               |       |                                |                  |                                |    |
| Total Mn                       | <b>-.784**</b>  | <b>.969**</b>   | <b>.678*</b>    | .439            | <b>.810**</b>  | <b>.737**</b> | -.370          | 1              |                |               |                |               |       |                                |                  |                                |    |
| Total Mg                       | -.392           | .330            | -.015           | .051            | .064           | -.096         | .056           | .434           | 1              |               |                |               |       |                                |                  |                                |    |
| Total Ca                       | -.486           | <b>.828**</b>   | .508            | .174            | <b>.886**</b>  | <b>.838**</b> | -.153          | <b>.769**</b>  | 1.000          | 1             |                |               |       |                                |                  |                                |    |
| Total K                        | .158            | -.154           | -.463           | -.336           | -.355          | -.486         | .462           | -.056          | <b>.772**</b>  | -.394         | 1              |               |       |                                |                  |                                |    |
| Total P                        | .138            | .306            | .510            | .227            | .472           | <b>.705**</b> | .033           | .139           | <b>-.688**</b> | .523          | <b>-.724**</b> | 1             |       |                                |                  |                                |    |
| OM                             | -.030           | .434            | <b>.725**</b>   | .453            | .486           | <b>.759**</b> | -.071          | .300           | -.415          | .417          | <b>-.657*</b>  | <b>.858**</b> | 1     |                                |                  |                                |    |
| Fe <sub>2</sub> O <sub>3</sub> | <b>.705**</b>   | -.288           | -.447           | -.500           | -.195          | -.143         | <b>1.000**</b> | -.369          | .056           | -.152         | .462           | .034          | -.069 | 1                              |                  |                                |    |
| SiO <sub>2</sub>               | <b>-.901**</b>  | <b>.822**</b>   | <b>.583*</b>    | .432            | <b>.707**</b>  | <b>.556*</b>  | -.502          | <b>.893**</b>  | .502           | <b>.608*</b>  | -.025          | -.079         | .106  | -.502                          | 1                |                                |    |
| Al <sub>2</sub> O <sub>3</sub> | <b>.800**</b>   | <b>-.861**</b>  | <b>-.741**</b>  | -.507           | <b>-.703**</b> | <b>-.681*</b> | .446           | <b>-.932**</b> | -.370          | <b>-.649*</b> | .081           | -.116         | -.329 | .446                           | -.857**          | 1                              |    |
| pH                             | <b>-.824**</b>  | <b>.722**</b>   | <b>.806**</b>   | <b>.663*</b>    | <b>.614*</b>   | <b>.618*</b>  | <b>-.696**</b> | <b>.793**</b>  | .095           | <b>.605*</b>  | -.401          | .239          | .399  | <b>-.696**</b>                 | <b>.847**</b>    | <b>-.857**</b>                 | 1  |

\* $P < 0.05$ ; \*\* $P < 0.01$ .

**Table S3.** Alpha diversity indices of ferromanganese nodules and surrounding soil.

|                   | Ferromanganese Nodules |       |                  | Surrounding Soil |       |                  |
|-------------------|------------------------|-------|------------------|------------------|-------|------------------|
|                   | PD                     | chao1 | Observed species | PD               | chao1 | Observed species |
| Sugarcane samples |                        |       |                  |                  |       |                  |
| 20 cm             | 187                    | 3942  | 1733             | 192              | 4682  | 1753             |
| 40 cm             | 253                    | 6579  | 2267             | 253              | 6402  | 2299             |
| 60 cm             | 229                    | 5725  | 2110             | 244              | 6319  | 2224             |
| 80 cm             | 242                    | 5970  | 2125             | 251              | 6792  | 2233             |
| Paddy samples     |                        |       |                  |                  |       |                  |
| 20 cm             | 102                    | 2520  | 941              | 242              | 6631  | 2137             |
| 40 cm             | 187                    | 2515  | 1586             | 245              | 6372  | 2182             |
| 60 cm             | 212                    | 3073  | 1781             | 240              | 6089  | 1999             |
| 80 cm             | 193                    | 4659  | 1745             | 236              | 6052  | 1898             |
| 100 cm            | 137                    | 3270  | 1354             | 190              | 4553  | 1569             |
| 120 cm            | 157                    | 3799  | 1269             | 217              | 3853  | 1896             |
| 140 cm            | 167                    | 2337  | 1395             | 231              | 4382  | 2018             |
| 160 cm            | 99                     | 1782  | 753              | 199              | 3790  | 1870             |
| 180 cm            | 125                    | 2189  | 1013             | 178              | 3690  | 1669             |

**Table S4.** Microbial composition of ferromanganese nodules at order level \*.

| Taxon                            | Paddy field samples |          |          |          |           |            |            |            |            | Sugarcane field samples |          |          |          |
|----------------------------------|---------------------|----------|----------|----------|-----------|------------|------------|------------|------------|-------------------------|----------|----------|----------|
|                                  | 0-20 cm             | 20-40 cm | 40-60 cm | 60-80 cm | 80-100 cm | 100-120 cm | 120-140 cm | 140-160 cm | 160-180 cm | 0-20 cm                 | 20-40 cm | 40-60 cm | 60-80 cm |
| Acidobacteriaceae                | 4.05%               | 4.16%    | 2.20%    | 1.56%    | 13.50%    | 4.95%      | 3.76%      | 4.16%      | 2.18%      | 3.30%                   | 4.63%    | 5.07%    | 3.83%    |
| Actinomycetales                  | 1.99%               | 1.91%    | 1.42%    | 0.93%    | 0.55%     | 1.83%      | 2.04%      | 2.01%      | 1.58%      | 1.34%                   | 1.74%    | 2.25%    | 2.08%    |
| Caldilineales                    | 2.12%               | 2.42%    | 2.35%    | 1.52%    | 1.04%     | 2.27%      | 2.64%      | 2.91%      | 2.48%      | 0.91%                   | 2.01%    | 1.96%    | 2.28%    |
| Veillonellaceae                  | 4.62%               | 4.19%    | 4.06%    | 2.02%    | 0.79%     | 3.73%      | 2.65%      | 3.26%      | 3.46%      | 4.25%                   | 4.22%    | 4.79%    | 4.29%    |
| Hyphomicrobiaceae                | 1.17%               | 1.24%    | 1.08%    | 0.93%    | 0.80%     | 1.65%      | 1.37%      | 1.66%      | 1.88%      | 0.34%                   | 0.81%    | 0.87%    | 0.68%    |
| Rhodospirillaceae                | 0.98%               | 1.01%    | 0.20%    | 0.63%    | 0.36%     | 1.26%      | 1.09%      | 0.95%      | 1.07%      | 1.11%                   | 1.38%    | 1.61%    | 1.58%    |
| Comamonadaceae                   | 3.74%               | 3.44%    | 4.55%    | 5.18%    | 1.84%     | 3.40%      | 2.04%      | 2.53%      | 4.73%      | 6.78%                   | 3.70%    | 4.70%    | 4.10%    |
| Burkholderiales Incertae sedis 5 | 0.74%               | 0.82%    | 2.40%    | 2.65%    | 0.50%     | 1.33%      | 0.91%      | 1.25%      | 2.89%      | 1.30%                   | 0.85%    | 0.92%    | 0.93%    |
| Oxalobacteraceae                 | 1.08%               | 1.13%    | 4.16%    | 4.55%    | 0.58%     | 0.75%      | 1.50%      | 1.35%      | 2.38%      | 1.16%                   | 0.75%    | 0.87%    | 0.81%    |
| Neisseriaceae                    | 1.36%               | 1.17%    | 2.50%    | 1.64%    | 0.45%     | 1.49%      | 0.90%      | 0.85%      | 2.01%      | 1.61%                   | 0.87%    | 1.44%    | 1.17%    |
| Rhodocyclaceae                   | 9.00%               | 7.28%    | 10.7%    | 12.3%    | 2.70%     | 5.04%      | 4.53%      | 6.41%      | 10.4%      | 12.1%                   | 7.05%    | 10.3%    | 9.51%    |
| Geobacteraceae                   | 3.88%               | 4.23%    | 3.28%    | 4.76%    | 1.12%     | 3.28%      | 3.18%      | 1.99%      | 4.43%      | 3.93%                   | 4.47%    | 4.59%    | 4.62%    |
| Cystobacterineae                 | 1.19%               | 1.05%    | 0.64%    | 0.63%    | 1.43%     | 1.09%      | 0.83%      | 1.42%      | 1.07%      | 0.95%                   | 1.32%    | 1.40%    | 1.33%    |
| Pseudomonadaceae                 | 2.86%               | 2.36%    | 1.47%    | 2.23%    | 0.50%     | 0.99%      | 1.75%      | 0.33%      | 1.21%      | 1.98%                   | 3.11%    | 2.05%    | 3.42%    |
| Verrucomicrobiales Subdivision 3 | 2.13%               | 2.26%    | 2.20%    | 2.32%    | 2.10%     | 1.98%      | 2.44%      | 1.21%      | 2.05%      | 0.64%                   | 1.63%    | 0.89%    | 1.76%    |

\* Microbial species with relative abundance larger than 1% are listed.

**Table S5.** Microbial composition of surrounding soil at order level \*.

| Taxon                            | Paddy field samples |          |          |          |           |            |            |            |            | Sugarcane field |          |          |          |
|----------------------------------|---------------------|----------|----------|----------|-----------|------------|------------|------------|------------|-----------------|----------|----------|----------|
|                                  | 0-20 cm             | 20-40 cm | 40-60 cm | 60-80 cm | 80-100 cm | 100-120 cm | 120-140 cm | 140-160 cm | 160-180 cm | 0-20 cm         | 20-40 cm | 40-60 cm | 60-80 cm |
| Acidobacteriaceae                | 40.5%               | 5.16%    | 5.65%    | 3.49%    | 2.48%     | 20.8%      | 5.38%      | 28.7%      | 1.15%      | 5.40%           | 5.00%    | 4.28%    | 3.91%    |
| Actinomycetales                  | 2.54%               | 2.93%    | 2.29%    | 2.25%    | 2.07%     | 1.58%      | 3.24%      | 0.96%      | 0.97%      | 3.87%           | 1.98%    | 1.74%    | 1.67%    |
| Crenotrichaceae                  | 8.00%               | 0.24%    | 0.25%    | 0.07%    | 0.28%     | 0.26%      | 0.14%      | 0.20%      | 0.07%      | 1.85%           | 0.80%    | 0.74%    | 0.61%    |
| Caldilineales                    | 0.13%               | 2.17%    | 1.60%    | 1.17%    | 2.97%     | 1.67%      | 1.16%      | 0.14%      | 1.36%      | 0.70%           | 2.01%    | 1.83%    | 1.95%    |
| Veillonellaceae                  | 0.07%               | 3.76%    | 2.44%    | 2.80%    | 7.45%     | 1.32%      | 2.23%      | 0.54%      | 4.83%      | 0.89%           | 4.14%    | 4.64%    | 2.91%    |
| Rhodospirillaceae                | 0.00%               | 1.53%    | 2.01%    | 0.95%    | 0.77%     | 0.53%      | 1.65%      | 0.06%      | 1.51%      | 0.36%           | 1.54%    | 1.42%    | 1.14%    |
| Burkholderiaceae                 | 1.17%               | 0.80%    | 0.95%    | 2.84%    | 0.50%     | 1.28%      | 2.04%      | 0.56%      | 2.64%      | 0.32%           | 0.89%    | 1.17%    | 0.75%    |
| Comamonadaceae                   | 2.38%               | 3.93%    | 3.32%    | 7.47%    | 1.78%     | 3.43%      | 5.23%      | 0.79%      | 7.07%      | 3.08%           | 3.88%    | 4.15%    | 5.53%    |
| Burkholderiales Incertae sedis 5 | 0.56%               | 2.36%    | 1.72%    | 4.73%    | 0.50%     | 2.11%      | 2.85%      | 0.32%      | 4.34%      | 1.22%           | 0.76%    | 0.76%    | 1.05%    |
| Oxalobacteraceae                 | 3.82%               | 0.98%    | 1.21%    | 1.27%    | 2.53%     | 2.68%      | 1.05%      | 0.46%      | 2.91%      | 0.32%           | 0.60%    | 0.64%    | 0.51%    |
| Rhodocyclaceae                   | 0.54%               | 4.52%    | 3.13%    | 10.9%    | 7.67%     | 6.82%      | 5.58%      | 1.33%      | 12.2%      | 3.04%           | 6.93%    | 8.34%    | 8.94%    |
| Geobacteraceae                   | 0.07%               | 4.41%    | 2.90%    | 4.53%    | 2.62%     | 2.42%      | 2.57%      | 0.32%      | 4.47%      | 4.03%           | 3.80%    | 4.17%    | 3.38%    |
| Moraxellaceae                    | 0.06%               | 2.14%    | 2.41%    | 7.66%    | 0.18%     | 2.29%      | 4.13%      | 0.66%      | 5.78%      | 0.14%           | 0.85%    | 0.71%    | 0.59%    |
| Pseudomonadaceae                 | 0.13%               | 2.32%    | 2.39%    | 2.71%    | 0.61%     | 1.10%      | 1.31%      | 0.41%      | 3.30%      | 0.67%           | 2.81%    | 3.17%    | 2.46%    |
| Verrucomicrobiales Subdivision 3 | 0.69%               | 1.32%    | 1.38%    | 1.21%    | 4.46%     | 1.63%      | 0.49%      | 6.02%      | 1.72%      | 1.26%           | 1.65%    | 1.81%    | 1.83%    |

\* Microbial species with relative abundance larger than 1% are listed.

**Table S6** .Pearson correlations of values of weathering indices with microbial composition.

|                    | Fe <sub>2</sub> O <sub>3</sub> | SiO <sub>2</sub> | Al <sub>2</sub> O <sub>3</sub> | SiO <sub>2</sub> /Al <sub>2</sub> O <sub>3</sub> | Al <sub>2</sub> O <sub>3</sub> /Fe <sub>2</sub> O <sub>3</sub> | SiO <sub>2</sub> /(Al <sub>2</sub> O <sub>3</sub> +Fe <sub>2</sub> O <sub>3</sub> ) |
|--------------------|--------------------------------|------------------|--------------------------------|--------------------------------------------------|----------------------------------------------------------------|-------------------------------------------------------------------------------------|
| Ferromanganese     |                                |                  |                                |                                                  |                                                                |                                                                                     |
| Nodules            |                                |                  |                                |                                                  |                                                                |                                                                                     |
| Acidobacteriales   | -.087                          | -.395            | .088                           | -.321                                            | .086                                                           | -.394                                                                               |
| Actinobacteridae   | .533                           | .151             | -.132                          | .197                                             | -.356                                                          | .005                                                                                |
| Sphingobacteriales | -.069                          | .104             | -.190                          | .145                                             | .098                                                           | .164                                                                                |
| Caldilineae        | .0617                          | .208             | .123                           | .074                                             | .046                                                           | .17                                                                                 |
| Chloroplast        | -.056                          | .182             | .242                           | .061                                             | .219                                                           | .157                                                                                |
| Clostridiales      | .071                           | .388             | .023                           | .243                                             | -.019                                                          | .367                                                                                |
| Rhizobiales        | .455                           | .302             | -.125                          | .294                                             | -.301                                                          | .178                                                                                |
| Rhodospirillales   | -.026                          | -.138            | .342                           | -.242                                            | .243                                                           | -.191                                                                               |
| Burkholderiales    | -.466                          | -.174            | .146                           | -.195                                            | .343                                                           | -.047                                                                               |
| Rhodocyclales      | -.219                          | .168             | -.012                          | .108                                             | .113                                                           | .247                                                                                |
| Desulfuromonales   | .135                           | .45              | -.193                          | .416                                             | -.174                                                          | .452                                                                                |
| Myxococcales       | <b>.629*</b>                   | <b>.700**</b>    | -.490                          | <b>.731**</b>                                    | <b>-.630*</b>                                                  | <b>.596*</b>                                                                        |
| Pseudomonadales    | -.456                          | -.244            | .365                           | -.326                                            | .486                                                           | -.161                                                                               |
| Verrucomicrobiales | .172                           | -.098            | -.106                          | -.0200                                           | -.165                                                          | -.141                                                                               |
| Surrounding        |                                |                  |                                |                                                  |                                                                |                                                                                     |
| Soil               |                                |                  |                                |                                                  |                                                                |                                                                                     |
| Acidobacteriales   | -.199                          | .123             | .075                           | -.009                                            | .156                                                           | .035                                                                                |
| Actinobacteridae   | .366                           | -.308            | .319                           | -.194                                            | .211                                                           | -.270                                                                               |
| Sphingobacteriales | -.125                          | -.207            | .120                           | -.064                                            | .186                                                           | -.103                                                                               |
| Caldilineae        | .161                           | .043             | .086                           | -.019                                            | .041                                                           | -.026                                                                               |
| Chloroplast        | -.137                          | -.100            | .055                           | .050                                             | .108                                                           | .005                                                                                |
| Clostridiales      | .152                           | -.314            | .161                           | -.079                                            | .113                                                           | -.163                                                                               |
| Rhizobiales        | .435                           | .260             | -.159                          | .185                                             | -.340                                                          | .157                                                                                |
| Rhodospirillales   | <b>.563*</b>                   | <b>-.703**</b>   | <b>.557*</b>                   | -.531                                            | .400                                                           | <b>-.623*</b>                                                                       |
| Burkholderiales    | -.085                          | .044             | -.242                          | .100                                             | -.232                                                          | .115                                                                                |
| Rhodocyclales      | .028                           | -.160            | -.107                          | .036                                             | -.128                                                          | -.007                                                                               |
| Desulfuromonales   | .255                           | -.387            | .154                           | -.142                                            | .072                                                           | -.225                                                                               |
| Myxococcales       | .260                           | -.305            | .476                           | -.266                                            | .417                                                           | -.318                                                                               |
| Pseudomonadales    | .156                           | -.294            | -.031                          | -.012                                            | -.087                                                          | -.097                                                                               |
| Verrucomicrobiales | -.342                          | .472             | -.423                          | .406                                             | -.333                                                          | .444                                                                                |

\**P* < 0.05; \*\**P* < 0.01.

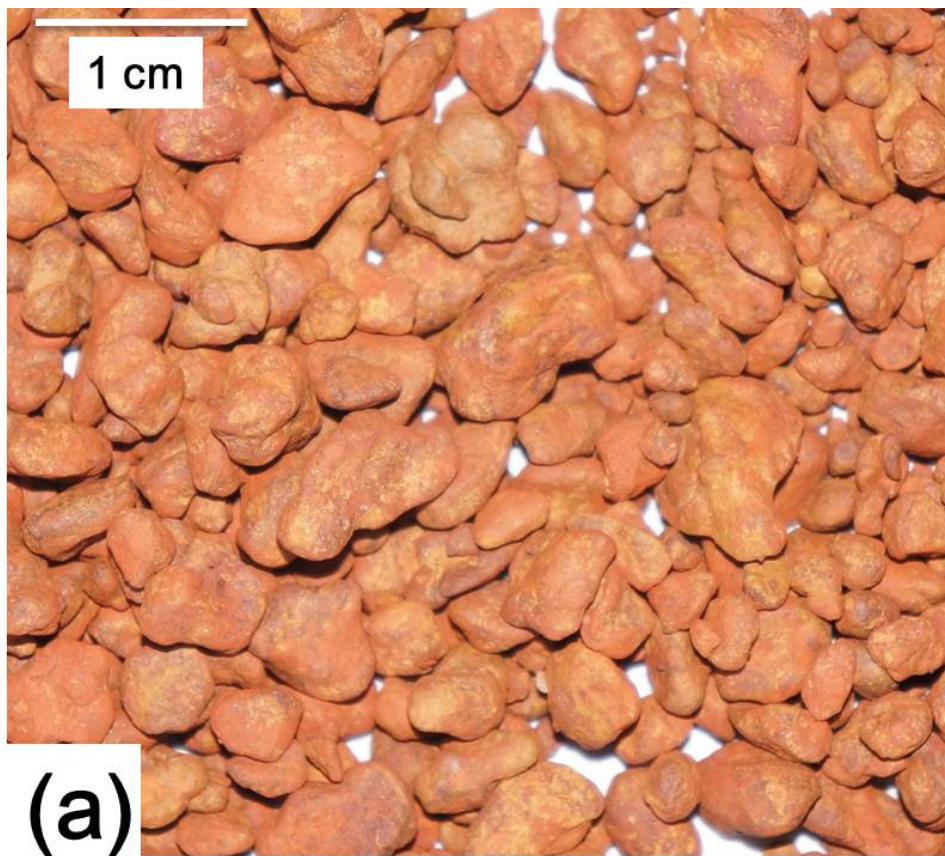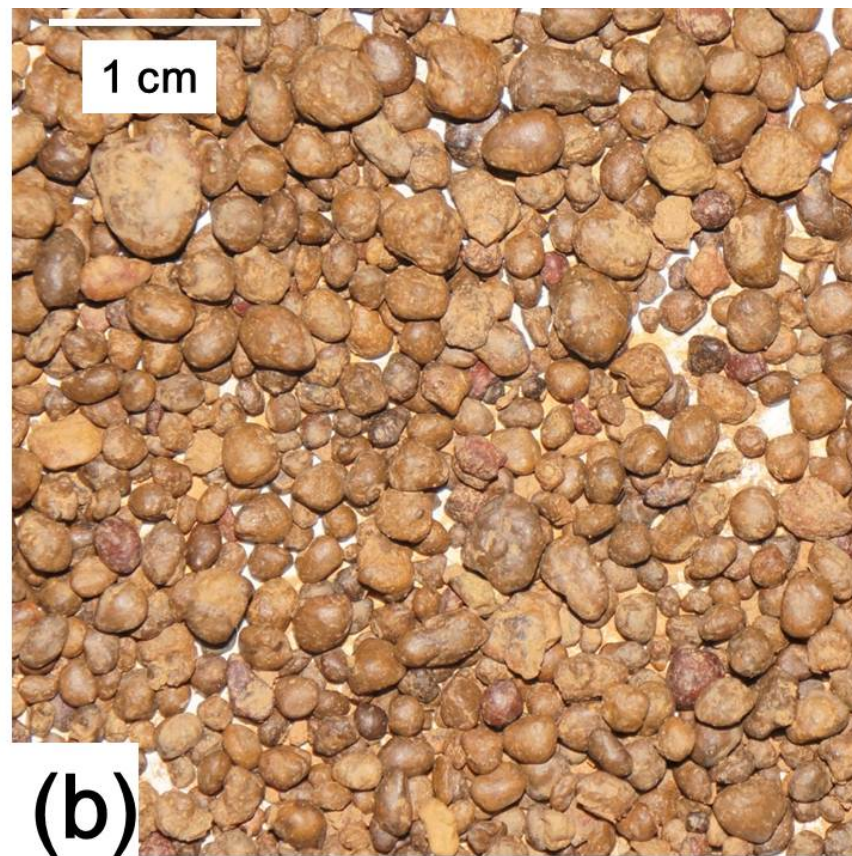

**Fig. S1.** Representative images of ferromanganese nodules from sugarcane field (a) and paddy field (b).



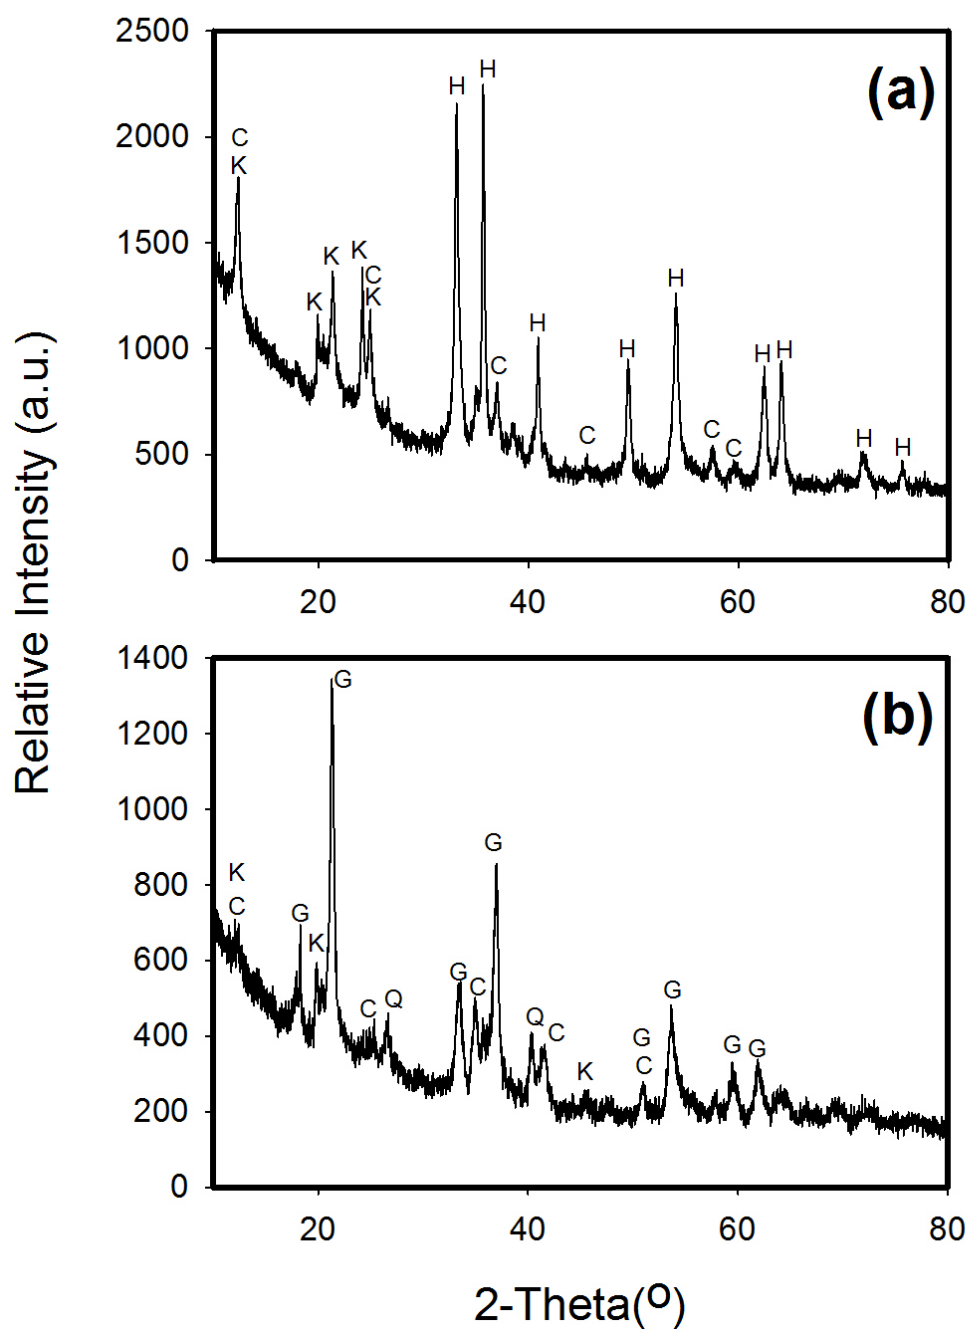

**Fig. S2.** XRD spectra of ferromanganese nodules, showing the mineralogical divergence of the FMNs from sugarcane field (a) and paddy field (b). C: Cronstedtite; G: Geothite; H: Hematite; K: Kaolinite; Q: Quartz.

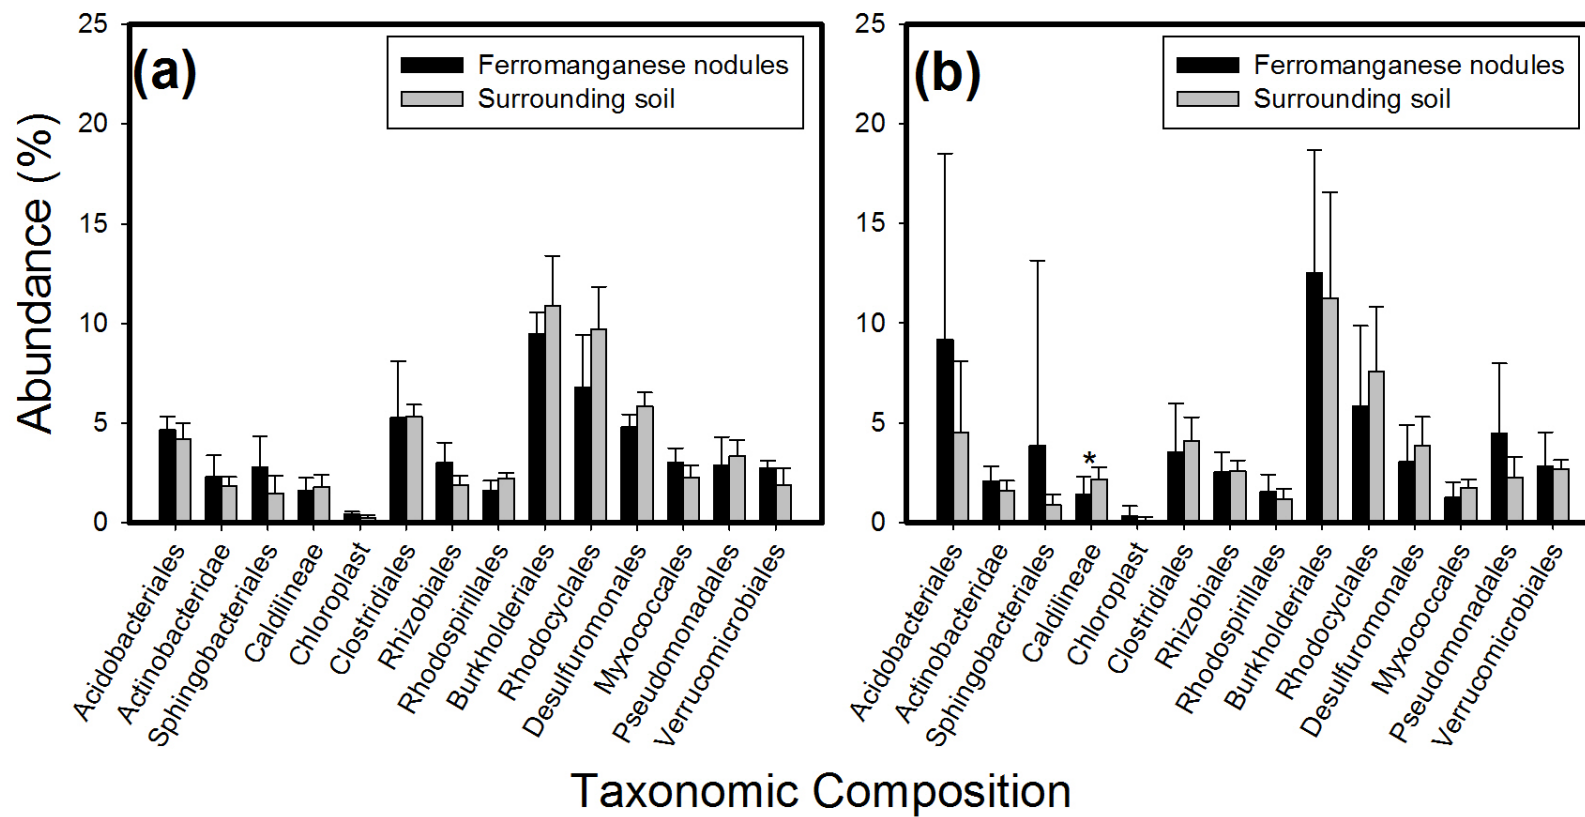

**Fig. S3.** Relative abundance of selected microbial taxa in the ferromanganese nodules and surrounding soil from sugarcane field (a) and paddy (b). The value was showed as mean  $\pm$  SD in sugarcane field samples (N=4) and paddy field samples (N=9). Asterisk represented significantly different ( $P < 0.05$ ) between ferromanganese and surrounding soil examined by independent  $t$ -test. Microbial species with relative abundance higher than 1% were shown.
